# Supplementary figures and images for: Dielectric Spectroscopy and Optical Density Measurement for the Online Monitoring and Control of Recombinant Protein Production in Stably Transformed Drosophila melanogaster S2 Cells
Source: MDPI journal article supplement (doi:10.3390/s18030900), 2018-03-18

Supplementary material S3

## Color change of the medium following the addition of copper sulfate

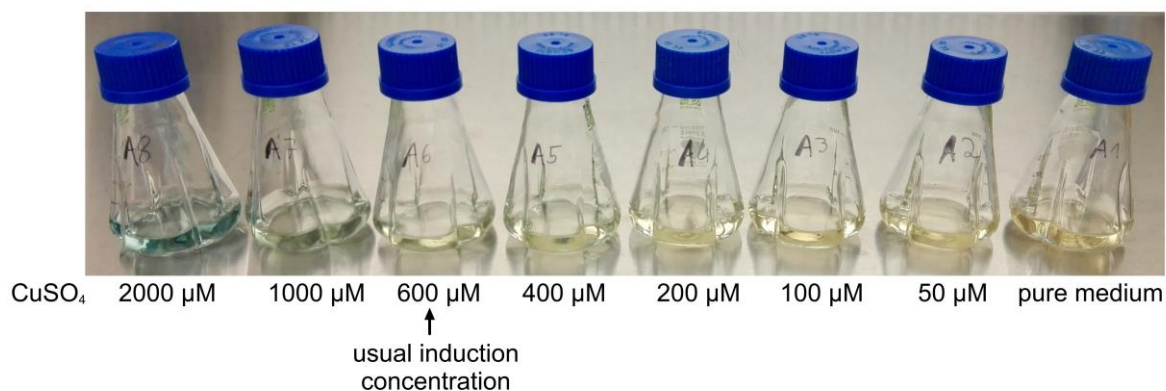

Supplement: s1 [file s1]
